# Supplementary material
Source: ML conference proceedings conference paper supplement (https://proceedings.neurips.cc/paper_files/paper/2017/hash/1b5230e3ea6d7123847ad55a1e06fffd-Abstract.html)
Supplement: Supplementary file [file 1b5230e3ea6d7123847ad55a1e06fffd-Supplemental.zip]

# Supplementary Material for “On Tensor Train Rank Minimization: Statistical Efficiency and Scalable Algorithm”

## A Proof of Theorem 1

The theorem is obtained immediately by combining Li et al. [12] and Mu et al. [15].

Let  $\Pi : \mathbb{R}^n \rightarrow \mathbb{R}^k$  be a sparse random projection defined by

$$\Pi_{ij} = \begin{cases} +\sqrt{s/k} & \text{probability } 1/2s, \\ 0 & \text{probability } 1 - 1/s, \\ -\sqrt{s/k} & \text{probability } 1/2s. \end{cases} \quad (11)$$

Then the following theorem holds.

**Lemma 6** (Lemma 4 in [12]). *Let  $u$  be a unit vector. Then  $\sqrt{k}(\Pi u)_i \rightarrow N(0, 1)$  and  $k\|\Pi u\|_2^2 \rightarrow \chi_k^2$  in law with the convergence rate*

$$|P(\sqrt{k}(\Pi u)_i < t) - P(N(0, 1) < t)| \leq 0.8\sqrt{s} \sum_j |u_j|^3. \quad (12)$$

□

Suppose that  $\sum_j |u_j|^3 \leq e^{-k\epsilon^2/4}/(1.6k\sqrt{s})$ . Then

$$|P(\|\Pi u\|_2^2 \in [1 - \epsilon, 1 + \epsilon]) - P(\chi_k^2 \in [k(1 - \epsilon), k(1 + \epsilon)])| \leq e^{-k\epsilon^2/4}. \quad (13)$$

By using

$$P(\chi_k^2 \in [k(1 - \epsilon), k(1 + \epsilon)]) \leq 2e^{-k(\epsilon^2 - \epsilon^3)/4}, \quad (14)$$

we have

$$P(\|\Pi u\|_2^2 \in [1 - \epsilon, 1 + \epsilon]) \leq 3e^{-k(\epsilon^2 - \epsilon^3)/4}. \quad (15)$$

The preservation of  $L_2$  norm implies the preservation of the Schatten-1 norm as follows.

**Lemma 7** (Restatement of Theorem 1 in [15]). *Let  $Z$  be an  $m \times n$  matrix with rank  $r$ . If  $k \geq r$  and  $\|\Pi u\|_2^2 \in [1 - \epsilon, 1 + \epsilon]$  for all singular vectors  $u$  of  $Z$ , we have*

$$\sqrt{(1 - \epsilon)/r} \|Z\|_s \leq \|\Pi Z\|_s \leq \sqrt{1 + \epsilon} \|Z\|_s. \quad (16)$$

□

Now we prove Theorem 1. Let  $Z = Q_k(X)$  be a  $\prod_{k'=1}^k I_{k'} \times \prod_{k'=k+1}^K I_{k'}$  matrix obtained by reshaping tensor  $X$ . Since  $X$  is a TT of rank  $(R_1, \dots, R_K)$ , the rank of matrix  $Z$  is at most  $R_k$ . By applying Lemma 7 twice, we obtain

$$\frac{1 - \epsilon}{R_k} \|Z\|_s \leq \|\Pi Z\|_s \leq (1 + \epsilon) \|Z\|_s \quad (17)$$

with some probability. If  $\sum_j |u_j|^3 \leq e^{-k\epsilon^2/4}/(1.6k\sqrt{s})$  for all singular vectors of  $Z$ , the probability is at least  $1 - 6R_k e^{-k\epsilon^2/4}$  since there are  $2R_k$  singular vectors.

## B Proof of Theorem 3

*Proof.* Since  $\hat{X}$  is the minimizer of the optimization problem, we have the following basic inequality

$$\frac{1}{2n} \|Y - \mathfrak{X}(\hat{X})\|^2 + \lambda_n \sum_{k=1}^{K-1} \|Q_k(\hat{X})\|_s \leq \frac{1}{2n} \|Y - \mathfrak{X}(\hat{X}^*)\|^2 + \lambda_n \sum_{k=1}^{K-1} \|Q_k(X^*)\|_s.$$

Using the relation that

$$\begin{aligned}\|Y - \mathfrak{X}(\widehat{X})\|^2 &= \|(Y - \mathfrak{X}(X^*)) - (\mathfrak{X}(\widehat{X}) - \mathfrak{X}(X^*))\|^2 \\ &= \|Y - \mathfrak{X}(X^*)\|^2 + \|\mathfrak{X}(\widehat{X}) - \mathfrak{X}(X^*)\|^2 - 2\langle Y - \mathfrak{X}(X^*), \mathfrak{X}(\widehat{X}) - \mathfrak{X}(X^*) \rangle,\end{aligned}$$

we rewrite the basic inequality as

$$\frac{1}{2n}\|\mathfrak{X}(\widehat{X}) - \mathfrak{X}(X^*)\|^2 \leq \frac{1}{n}\langle \mathfrak{X}(\widehat{X}) - \mathfrak{X}(X^*), \mathcal{E} \rangle + \lambda_n \sum_{k=1}^{K-1} \left( \|Q_k(X^*)\|_s - \|Q_k(\widehat{X})\|_s \right).$$

Define the error  $\Delta := \widehat{X} - X^*$ . Applying the Hölder's inequality, we have

$$\begin{aligned}\frac{1}{n}\langle \mathfrak{X}(\Delta), \mathcal{E} \rangle &= \frac{1}{n}\langle \Delta, \mathfrak{X}^*(\mathcal{E}) \rangle = \frac{1}{n} \frac{1}{K-1} \sum_{k=1}^{K-1} \langle Q_k(\Delta), \mathfrak{X}^*(\mathcal{E}) \rangle \\ &\leq \frac{1}{n} \frac{1}{K-1} \sum_{k=1}^{K-1} \|\mathcal{E}\|_\infty \|Q_k(\Delta)\|_s \leq \frac{\lambda_n}{K-1} \sum_{k=1}^{K-1} \|Q_k(\Delta)\|_s,\end{aligned}$$

where  $\mathfrak{X}^*$  is an adjoint operator of  $\mathfrak{X}$  and the last inequality holds by the setting of  $\lambda_n$ . Also, the triangle inequality and the linearity of  $Q_k(\cdot)$  yield

$$\|Q_k(X^*)\|_s - \|Q_k(\widehat{X})\|_s \leq \|Q_k(\Delta)\|_s.$$

Then, we bound the inequality as

$$\frac{1}{2n}\|\mathfrak{X}(\Delta)\|^2 \leq \frac{\lambda_n}{K-1} \sum_{k=1}^{K-1} \|Q_k(\Delta)\|_s + \frac{\lambda_n}{K-1} \sum_{k=1}^{K-1} \|Q_k(\Delta)\|_s = \frac{2\lambda_n}{K-1} \sum_{k=1}^{K-1} \|Q_k(\Delta)\|_s.$$

To bound  $\|Q_k(\Delta)\|_s$ , we apply the result of Lemma 1 in [16] and Lemma 2 in [28]. Along with proof of the lemmas, we obtain the property that a rank of  $Q_k(\Delta)$  is bounded by  $2R_k$ , thus the Cauchy-Schwartz inequality implies

$$\|Q_k(\Delta)\|_s \leq \sqrt{2R_k} \|Q_k(\Delta)\|_F.$$

Then we obtain

$$\|\mathfrak{X}(\Delta)\|_F^2 \leq \frac{2\lambda_n}{K-1} \sum_{k=1}^{K-1} \sqrt{2R_k} \|Q_k(\Delta)\|_F.$$

We apply the completion theory by [3] and [2] to bound  $\|\mathfrak{X}(\Delta)\|_F^2$  below. Let  $k' \in \{1, \dots, K\}$  be the index which satisfies Assumption 2, and we have  $\|\mathfrak{X}(\Delta)\|^2 = \|\widetilde{\mathfrak{X}}(Q_{k'}(\Delta))\|^2$  where  $\widetilde{\mathfrak{X}}$  is a rearranging operator for the reshaped tensor. Then, Theorem 7 in [3] yields that

$$\|Q_{k'}(\Delta)\|_F \leq \left( \sqrt{\frac{48 \min\{I_{\leq k'}, I_{k' <}\}}{n}} + 1 \right) \|\widetilde{\mathfrak{X}}(Q_{k'}(\Delta))\|,$$

with probability at least  $1 - (\max\{I_{\leq k'}, I_{k' <}\})^{-3}$  and

$$n \geq C_{m'} \mu_{k'}^2 \max\{I_{\leq k'}, I_{k' <}\} R_{k'} \log^3 \max\{I_{\leq k'}, I_{k' <}\},$$

with a constant  $C_{m'} > 0$ . Then we obtain that

$$\frac{1}{n} \|\widetilde{\mathfrak{X}}(Q_{k'}(\Delta))\|^2 \geq C_{\kappa'} \|Q_{k'}(\Delta)\|_F^2 = C_{\kappa'} \|\Delta\|_F^2,$$

where  $C_{\kappa} = (144 \min\{I_{\leq k'}, I_{k' <}\} + 3n)^{-1} > 0$ .

Finally, we have

$$\begin{aligned}\|\Delta\|_F^2 &\leq C_{\kappa'}^{-1} \frac{2\lambda_n}{K-1} \sum_{k=1}^{K-1} \sqrt{2R_k} \|Q_k(\Delta)\|_F \\ &= C_{\kappa'}^{-1} \|\Delta\|_F \frac{2\lambda_n}{K-1} \sum_{k=1}^{K-1} \sqrt{2R_k} \\ &= 3C_{\kappa'}^{-1} \|\Delta\|_F \frac{\lambda_n}{K} \sum_{k=1}^{K-1} \sqrt{2R_k}.\end{aligned}$$

Dividing both hands side by  $\|\Delta\|_F$  provides the result. □

## C Proof of Theorem 5

Preliminarily, we introduce an alternative formation of the optimization problem. For each  $k \in \{1, 2, \dots, K\}$ , we rewrite the term  $X_k(\mathcal{G})$  as

$$G_k \times_2 G_{<k} \times_3 G_{k<},$$

where  $\times_j$  denotes the  $j$ -mode product (for detail, see [10]). Here,  $G_{<k}$  is a tensor with size  $R_k \times I_1 \times \dots \times I_{K-1}$  and its element is given as

$$[G_{<k}]_{r,j_1,\dots,j_{k-1}} = [G_1]_{j_1,:,\dots} [G_2]_{j_2,:,\dots} \cdots [G_{k-1}]_{j_{k-1},:,\dots,r},$$

for  $j_{k'} = 1, \dots, I_{k'}$  and  $r = 1, \dots, R_k$ . Namely,  $G_{<k}$  is the left side of tensor train decomposition of  $X$  than  $G_k$ . Similarly,  $G_{k<}$  is a tensor with size  $R_{k+1} \times I_{k+1} \times \dots \times I_K$  and its element is given as

$$[G_{k<}]_{r,j_{k+1},\dots,j_K} = [G_{k+1}]_{j_{k+1},r,\dots} \cdots [G_K]_{j_K,:,\dots},$$

for  $j_{k'} = 1, \dots, I_{k'}$  and  $r = 1, \dots, R_{k+1}$ . Using the result, the ALS optimization problem (9) is rewritten as

$$\min_{G_k} \left[ \frac{1}{2n} \|Y - \mathfrak{X}(G_k \times_2 G_{<k} \times_3 G_{k<})\|^2 + \frac{\lambda_n}{K-1} \sum_{k'=1}^{K-1} \|\mathcal{P}_{k'}(G_k \times_2 G_{<k} \times_3 G_{k<})\|_s \right]. \quad (18)$$

When  $k = 1$ , we set  $G_{<k} = 1$ . Similarly, when  $k = K$ ,  $G_{k<} = 1$  holds.

Using the formula, we investigate the convergence of  $G_k$  by fixing other elements as  $G_{<k} = \tilde{G}_{<k}$  and  $G_{k<} = \tilde{G}_{k<}$ . Let  $\{G_k^*\}_{k=1}^K$  be a set of tensor which formulates the true tensor  $X^*$ . Also,  $G_{<k}^*$  and  $G_{k<}^*$  are defined similarly. To evaluate the convergence, we introduce that

$$\Xi(\tilde{\mathcal{G}}) := \max_{k \in \{1, \dots, K\}} \left[ \|\tilde{G}_k - G_k^*\|_F \right].$$

We obtain the following lemma which evaluates the optimization of (18) with given  $\tilde{G}_{<k}$  and  $\tilde{G}_{k<}$ .

**Lemma 8.** *For each  $k \in \{1, \dots, K\}$ , consider the optimization (18) with respect to  $G_k$  with given  $\tilde{\mathcal{G}}$ . Then, with probability at least  $1 - (\max\{I_{\leq k'}, I_{k'<}\})^{-3}$  and*

$$n \geq C_m \mu_{k'}^2 \max\{I_{\leq k'}, I_{k'<}\} R_{k'} \log^n \max\{I_{\leq k'}, I_{k'<}\},$$

*we obtain*

$$\|\hat{G}_k - G_k^*\| \leq 6(C_\kappa C_K)^{-1} \left\{ 2(K-1)C_K(1+n^{-1})\Xi(\tilde{\mathcal{G}}) + \frac{2\lambda_n(2+\epsilon)}{K-1} \sum_{k'=1}^{K-1} \sqrt{2R_{k'}} \right\}.$$

*Proof.* Our proof takes following four steps: 1) derive a basic inequality from the optimality condition, 2) bound terms of the RHS of the basis inequality, 3) bound below the LHS of the basis inequality, and 4) combine the result.

**Step 1.** Derive a basic inequality.

By the optimality condition of (18) with given  $\tilde{G}_{<k}$  and  $\tilde{G}_{k<}$ , we have

$$\begin{aligned} & \frac{1}{2n} \|Y - \mathfrak{X}(\hat{G}_k \times_2 \tilde{G}_{<k} \times_3 \tilde{G}_{k<})\|^2 + \frac{\lambda_n}{K-1} \sum_{k'=1}^{K-1} \|\mathcal{P}_{k'}(\hat{G}_k \times_2 \tilde{G}_{<k} \times_3 \tilde{G}_{k<})\|_s \\ & \leq \frac{1}{2n} \|Y - \mathfrak{X}(G_k^* \times_2 \tilde{G}_{<k} \times_3 \tilde{G}_{k<})\|^2 + \frac{\lambda_n}{K-1} \sum_{k'=1}^{K-1} \|\mathcal{P}_{k'}(G_k^* \times_2 \tilde{G}_{<k} \times_3 \tilde{G}_{k<})\|_s. \end{aligned} \quad (19)$$

Using the triangle inequality and the linearity of  $\mathfrak{X}$  and the mode product  $\times_j$ , we obtain

$$\begin{aligned}
& \|Y - \mathfrak{X}(\widehat{G}_k \times_2 \widetilde{G}_{<k} \times_3 \widetilde{G}_{k<})\|^2 \\
&= \|\{Y - \mathfrak{X}(G_k^* \times_2 \widetilde{G}_{<k} \times_3 \widetilde{G}_{k<})\} - \{\mathfrak{X}(\widehat{G}_k \times_2 \widetilde{G}_{<k} \times_3 \widetilde{G}_{k<}) - \mathfrak{X}(G_k^* \times_2 \widetilde{G}_{<k} \times_3 \widetilde{G}_{k<})\}\|^2 \\
&= \|\{Y - \mathfrak{X}(G_k^* \times_2 \widetilde{G}_{<k} \times_3 \widetilde{G}_{k<})\} - \mathfrak{X}((\widehat{G}_k - G_k^*) \times_2 \widetilde{G}_{<k} \times_3 \widetilde{G}_{k<})\|^2 \\
&= \|Y - \mathfrak{X}(G_k^* \times_2 \widetilde{G}_{<k} \times_3 \widetilde{G}_{k<})\|^2 + \|\mathfrak{X}((\widehat{G}_k - G_k^*) \times_2 \widetilde{G}_{<k} \times_3 \widetilde{G}_{k<})\|^2 \\
&\quad - 2\langle Y - \mathfrak{X}(G_k^* \times_2 \widetilde{G}_{<k} \times_3 \widetilde{G}_{k<}), \mathfrak{X}((\widehat{G}_k - G_k^*) \times_2 \widetilde{G}_{<k} \times_3 \widetilde{G}_{k<}) \rangle.
\end{aligned}$$

Substituting the result into (19), we obtain that

$$\begin{aligned}
& \frac{1}{2n} \|\mathfrak{X}((\widehat{G}_k - G_k^*) \times_2 \widetilde{G}_{<k} \times_3 \widetilde{G}_{k<})\|^2 + \frac{\lambda_n}{K-1} \sum_{k'=1}^{K-1} \|\mathcal{P}_{k'}(\widehat{G}_k \times_2 \widetilde{G}_{<k} \times_3 \widetilde{G}_{k<})\|_s \\
& \leq \frac{1}{n} \langle Y - \mathfrak{X}(G_k^* \times_2 \widetilde{G}_{<k} \times_3 \widetilde{G}_{k<}), \mathfrak{X}((\widehat{G}_k - G_k^*) \times_2 \widetilde{G}_{<k} \times_3 \widetilde{G}_{k<}) \rangle \\
& \quad + \frac{\lambda_n}{K-1} \sum_{k'=1}^{K-1} \|\mathcal{P}_{k'}(G_k^* \times_2 \widetilde{G}_{<k} \times_3 \widetilde{G}_{k<})\|_s. \tag{20}
\end{aligned}$$

About the regularization term, we apply the following inequality

$$\begin{aligned}
& \frac{\lambda_n}{K-1} \sum_{k'=1}^{K-1} \|\mathcal{P}_{k'}(G_k^* \times_2 \widetilde{G}_{<k} \times_3 \widetilde{G}_{k<})\|_s - \frac{\lambda_n}{K-1} \sum_{k'=1}^{K-1} \|\mathcal{P}_{k'}(\widehat{G}_k \times_2 \widetilde{G}_{<k} \times_3 \widetilde{G}_{k<})\|_s \\
& \leq \frac{\lambda_n}{K-1} \sum_{k'=1}^{K-1} \|\mathcal{P}_{k'}((G_k^* - \widehat{G}_k) \times_2 \widetilde{G}_{<k} \times_3 \widetilde{G}_{k<})\|_s \\
& = \frac{\lambda_n}{K-1} \sum_{k'=1}^{K-1} \left( \|Q_{k'}((G_k^* - \widehat{G}_k) \times_2 \widetilde{G}_{<k} \times_3 \widetilde{G}_{k<})\|_s \right. \\
& \quad \left. - \|\mathcal{P}_{k'}((G_k^* - \widehat{G}_k) \times_2 \widetilde{G}_{<k} \times_3 \widetilde{G}_{k<})\|_s - \|Q_{k'}((G_k^* - \widehat{G}_k) \times_2 \widetilde{G}_{<k} \times_3 \widetilde{G}_{k<})\|_s \right), \tag{21}
\end{aligned}$$

by using the triangle inequality and the linearity of the random projection operator  $\mathcal{P}_{k'}$ . Here, we apply Theorem 1 with  $\epsilon$  and obtain

$$\begin{aligned}
& \left( \frac{1-\epsilon}{2R_{k'}} - 1 \right) \|Q_{k'}((G_k^* - \widehat{G}_k) \times_2 \widetilde{G}_{<k} \times_3 \widetilde{G}_{k<})\|_s \\
& \leq \|\mathcal{P}_{k'}((G_k^* - \widehat{G}_k) \times_2 \widetilde{G}_{<k} \times_3 \widetilde{G}_{k<})\|_s - \|Q_{k'}((G_k^* - \widehat{G}_k) \times_2 \widetilde{G}_{<k} \times_3 \widetilde{G}_{k<})\|_s \\
& \leq \epsilon \|Q_{k'}((G_k^* - \widehat{G}_k) \times_2 \widetilde{G}_{<k} \times_3 \widetilde{G}_{k<})\|_s.
\end{aligned}$$

Here, the denominator in the left hand side follows Lemma 1 in [16]. Then we have

$$\begin{aligned}
& \left| \|\mathcal{P}_{k'}((G_k^* - \widehat{G}_k) \times_2 \widetilde{G}_{<k} \times_3 \widetilde{G}_{k<})\|_s - \|Q_{k'}((G_k^* - \widehat{G}_k) \times_2 \widetilde{G}_{<k} \times_3 \widetilde{G}_{k<})\|_s \right| \\
& \leq \max\{\epsilon, |(1-\epsilon)/(2R_{k'}) - 1|\} \|Q_{k'}((G_k^* - \widehat{G}_k) \times_2 \widetilde{G}_{<k} \times_3 \widetilde{G}_{k<})\|_s \\
& \leq (1+\epsilon) \|Q_{k'}((G_k^* - \widehat{G}_k) \times_2 \widetilde{G}_{<k} \times_3 \widetilde{G}_{k<})\|_s.
\end{aligned}$$

Using this result and continue (21) then we have

$$(21) \leq \frac{\lambda_n}{K-1} \sum_{k'=1}^{K-1} (2+\epsilon) \|Q_{k'}((G_k^* - \widehat{G}_k) \times_2 \widetilde{G}_{<k} \times_3 \widetilde{G}_{k<})\|_s. \tag{22}$$

About the first term of the RHS of (20), we decompose it as

$$\begin{aligned}
& \frac{1}{n} \langle Y - \mathfrak{X}(G_k^* \times_2 \tilde{G}_{<k} \times_3 \tilde{G}_{k<}), \mathfrak{X}((\hat{G}_k - G_k^*) \times_2 \tilde{G}_{<k} \times_3 \tilde{G}_{k<}) \rangle \\
&= \frac{1}{n} \langle Y - \mathfrak{X}(G_k^* \times_2 G_{<k}^* \times_3 G_{k<}^*), \mathfrak{X}((\hat{G}_k - G_k^*) \times_2 \tilde{G}_{<k} \times_3 \tilde{G}_{k<}) \rangle \\
&\quad + \frac{1}{n} \langle \mathfrak{X}(G_k^* \times_2 (\tilde{G}_{<k} - G_{<k}^*) \times_3 G_{k<}^*), \mathfrak{X}((\hat{G}_k - G_k^*) \times_2 \tilde{G}_{<k} \times_3 \tilde{G}_{k<}) \rangle \\
&\quad + \frac{1}{n} \langle \mathfrak{X}(G_k^* \times_2 G_{<k}^* \times_3 (\tilde{G}_{k<} - G_{k<}^*)), \mathfrak{X}((\hat{G}_k - G_k^*) \times_2 \tilde{G}_{<k} \times_3 \tilde{G}_{k<}) \rangle \\
&\quad + \frac{1}{n} \langle \mathfrak{X}(G_k^* \times_2 (\tilde{G}_{<k} - G_{<k}^*) \times_3 (\tilde{G}_{k<} - G_{k<}^*)), \mathfrak{X}((\hat{G}_k - G_k^*) \times_2 \tilde{G}_{<k} \times_3 \tilde{G}_{k<}) \rangle \\
&=: T_0 + T_1 + T_2 + T_3.
\end{aligned}$$

About the term  $T_0$ , we use the observation model (2) and the adjoint operator  $\mathfrak{X}^*$  then obtain

$$\begin{aligned}
T_0 &= \frac{1}{n} \langle \mathcal{E}, \mathfrak{X}((\hat{G}_k - G_k^*) \times_2 \tilde{G}_{<k} \times_3 \tilde{G}_{k<}) \rangle \\
&= \frac{1}{n} \langle \mathfrak{X}^*(\mathcal{E}), (\hat{G}_k - G_k^*) \times_2 \tilde{G}_{<k} \times_3 \tilde{G}_{k<} \rangle.
\end{aligned}$$

Since the reshaping does not affect the value of the inner product, we continue to evaluate  $T_0$  as

$$\begin{aligned}
T_0 &= \frac{1}{n} \langle \mathfrak{X}^*(\mathcal{E}), (\hat{G}_k - G_k^*) \times_2 \tilde{G}_{<k} \times_3 \tilde{G}_{k<} \rangle \\
&= \frac{1}{n(K-1)} \sum_{k'=1}^{K-1} \langle Q_{k'}(\mathfrak{X}^*(\mathcal{E})), Q_{k'}((\hat{G}_k - G_k^*) \times_2 \tilde{G}_{<k} \times_3 \tilde{G}_{k<}) \rangle \\
&\leq \frac{1}{n(K-1)} \sum_{k'=1}^{K-1} \|Q_{k'}(\mathfrak{X}^*(\mathcal{E}))\|_\infty \|Q_{k'}((\hat{G}_k - G_k^*) \times_2 \tilde{G}_{<k} \times_3 \tilde{G}_{k<})\|_s \\
&= \frac{1}{n(K-1)} \|\mathfrak{X}^*(\mathcal{E})\|_\infty \sum_{k'=1}^{K-1} \|Q_{k'}((\hat{G}_k - G_k^*) \times_2 \tilde{G}_{<k} \times_3 \tilde{G}_{k<})\|_s \\
&\leq \frac{\lambda_n}{(K-1)} \sum_{k'=1}^{K-1} \|Q_{k'}((\hat{G}_k - G_k^*) \times_2 \tilde{G}_{<k} \times_3 \tilde{G}_{k<})\|_s.
\end{aligned}$$

The first inequality follows the Hölder's inequality, and the second inequality is derived by the setting of  $\lambda_n$ .

Substituting (22) and the bounds with  $T_1, T_2, T_3$  and  $T_0$  into (20), finally we obtain

$$\begin{aligned}
& \frac{1}{2n} \|\mathfrak{X}((\hat{G}_k - G_k^*) \times_2 \tilde{G}_{<k} \times_3 \tilde{G}_{k<})\|^2 \\
&\leq T_1 + T_2 + T_3 + \underbrace{\frac{\lambda_n}{K-1} \sum_{k'=1}^{K-1} (2+\epsilon) \|Q_{k'}((G_k^* - \hat{G}_k) \times_2 \tilde{G}_{<k} \times_3 \tilde{G}_{k<})\|_s}_{=: T_4}. \quad (23)
\end{aligned}$$

Here, we obtain the basic inequality.

**Step 2.** Bound the RHS of the basic inequality.

For brevity, we introduce notation

$$\tilde{\Delta}_k := (\hat{G}_k - G_k^*) \times_2 \tilde{G}_{<k} \times_3 \tilde{G}_{k<}.$$

We bound  $T_1$  by using the Cauchy-Schwartz inequality as

$$\begin{aligned}
T_1 &= \frac{1}{n} \langle \mathfrak{X}(G_k^* \times_2 (\tilde{G}_{<k} - G_{<k}^*) \times_3 G_{k<}^*), \mathfrak{X}((\hat{G}_k - G_k^*) \times_2 \tilde{G}_{<k} \times_3 \tilde{G}_{k<}) \rangle \\
&\leq \frac{1}{n} \|\mathfrak{X}(G_k^* \times_2 (\tilde{G}_{<k} - G_{<k}^*) \times_3 G_{k<}^*)\| \|\mathfrak{X}((\hat{G}_k - G_k^*) \times_2 \tilde{G}_{<k} \times_3 \tilde{G}_{k<})\| \\
&\leq \frac{1}{n} \|G_k^* \times_2 (\tilde{G}_{<k} - G_{<k}^*) \times_3 G_{k<}^*\|_F \|(\hat{G}_k - G_k^*) \times_2 \tilde{G}_{<k} \times_3 \tilde{G}_{k<}\|_F \\
&\leq \frac{1}{n} \|G_k^* \times_2 (\tilde{G}_{<k} - G_{<k}^*) \times_3 G_{k<}^*\|_F \|\tilde{\Delta}_k\|_F,
\end{aligned}$$

here we use the relation  $\|\mathfrak{X}(X)\|^2 \leq \|X\|_F^2$  for all  $X \in \Theta$ . We introduce a constant  $c_k$  for  $k = 1, \dots, K$  which satisfying  $c_k \geq \|A \times_k G_k^*\|_F / \|A\|_F$  where  $A$  is a tensor with proper size. Since we suppose that the reshaped matrix from  $G_k^*$  has  $R_k$  row rank, we can guarantee that  $c_k$  is positive and finite. Using  $c_k$ , we have

$$\begin{aligned}
&\|G_k^* \times_2 (\tilde{G}_{<k} - G_{<k}^*) \times_3 G_{k<}^*\| \\
&\leq c_k \prod_{k' > k} c_{k'} \|\tilde{G}_{<k} - G_{<k}^*\|_F \\
&\leq c_k \prod_{k' > k} c_{k'} \sum_{k' < k} \|\tilde{G}_{k'} - G_{k'}^*\|_F \prod_{\ell < k, \ell \neq k'} c_\ell \\
&\leq \prod_{k' \geq k} c_{k'} (k-1) \prod_{\ell < k} c_\ell \Xi(\tilde{\mathcal{G}}) \\
&= (k-1) \prod_{k'=1}^K c_{k'} \Xi(\tilde{\mathcal{G}}).
\end{aligned}$$

Here, we define  $C_K := \prod_{k'=1}^K c_{k'}$ , we obtain

$$T_1 \leq \frac{1}{n} (k-1) C_K \Xi(\tilde{\mathcal{G}}). \quad (24)$$

Similarly, we obtain

$$T_2 \leq \frac{1}{n} (K-k) C_K \Xi(\tilde{\mathcal{G}}). \quad (25)$$

About  $T_3$ , we have

$$\begin{aligned}
T_3 &= \frac{1}{n} \langle \mathfrak{X}(G_k^* \times_2 (\tilde{G}_{<k} - G_{<k}^*) \times_3 (\tilde{G}_{k<} - G_{k<}^*)), \mathfrak{X}((\hat{G}_k - G_k^*) \times_2 \tilde{G}_{<k} \times_3 \tilde{G}_{k<}) \rangle \\
&\leq \frac{1}{n} \|G_k^* \times_2 (\tilde{G}_{<k} - G_{<k}^*) \times_3 (\tilde{G}_{k<} - G_{k<}^*)\|_F \|\Delta_k\|_F.
\end{aligned}$$

We evaluate the first norm as

$$\begin{aligned}
&\|G_k^* \times_2 (\tilde{G}_{<k} - G_{<k}^*) \times_3 (\tilde{G}_{k<} - G_{k<}^*)\|_F \\
&\leq c_k \left( \|\tilde{G}_{<k} \times_3 (\tilde{G}_{k<} - G_{k<}^*)\|_F + \|G_{<k}^* \times_3 (\tilde{G}_{k<} - G_{k<}^*)\|_F \right) \\
&\leq \frac{2}{n} (K-1) C_K \Xi(\tilde{\mathcal{G}}).
\end{aligned}$$

Then, we have

$$T_3 \leq \frac{2}{n} (K-1) C_K \Xi(\tilde{\mathcal{G}}). \quad (26)$$

To bound  $T_4$ , we apply the same line of the proof of Theorem 3. Along with Lemma 1 in [16], we bound the Schatten norm of  $Q_k(\tilde{\Delta}_k)$  and apply the Cauchy-Schwartz inequality, then obtain

$$T_4 \leq \frac{2\lambda_n(2+\epsilon)}{K-1} \sum_{k'=1}^{K-1} \sqrt{2R_{k'}} \|Q_{k'}(\tilde{\Delta}_k)\| = \frac{2\lambda_n(2+\epsilon)}{K-1} \sum_{k'=1}^{K-1} \sqrt{2R_{k'}} \|\tilde{\Delta}_k\|.$$

Combining the bound with (24), (25) and (26), we update the bound (23) as

$$\begin{aligned} \frac{1}{2n} \|\mathfrak{X}(\tilde{\Delta}_k)\|^2 &\leq \frac{3(K-1)C_K}{n} \Xi(\tilde{\mathcal{G}}) \|\mathfrak{X}(\tilde{\Delta}_k)\| + \frac{2\lambda_n(2+\epsilon)}{K-1} \sum_{k'=1}^{K-1} \sqrt{2R_{k'}} \|\tilde{\Delta}_k\| \\ &\leq \frac{3(K-1)C_K}{n} \Xi(\tilde{\mathcal{G}}) \|\tilde{\Delta}_k\|_F + \frac{2\lambda_n(2+\epsilon)}{K-1} \sum_{k'=1}^{K-1} \sqrt{2R_{k'}} \|\tilde{\Delta}_k\|. \end{aligned} \quad (27)$$

**Step 3.** Bound below the LHS of the basic inequality.

We apply the matrix completion theory developed by [3] and [2]. Let  $k' \in \{1, \dots, K\}$  be the index satisfying Assumption 2. Since the value of the  $L^2$ -norm and the Frobenius norm is invariant to the shape of tensors, we compare the value of  $\|Q_{k'}(\Delta_k)\|_F$  and  $\|\mathfrak{X}(Q_{k'}(\Delta_k))\|_F$  with  $k'$  instead of  $\|\Delta_k\|_F$  and  $\|\mathfrak{X}(\Delta_k)\|_F$ .

For the matrix  $Q_{k'}(X^*)$ , we apply Assumption 2 and obtain that  $Q_{k'}(X^*)$  has the  $\mu_{k'}$ -incoherence property. Then, we apply Theorem 2 and Theorem 7 in [3], we obtain the following inequality as

$$\|Q_{k'}(\tilde{\Delta}_k)\|_F \leq \left( \sqrt{\frac{48 \min\{I_{\leq k'}, I_{k' <}\}}{n}} + 1 \right) \|\mathfrak{X}(Q_{k'}(\tilde{\Delta}_k))\|,$$

with probability at least  $1 - (\max\{I_{\leq k'}, I_{k' <}\})^{-3}$  and

$$n \geq C_m \mu_{k'}^2 \max\{I_{\leq k'}, I_{k' <}\} R_{k'} \log^3 \max\{I_{\leq k'}, I_{k' <}\},$$

with a constant  $C_m > 0$ . Then we obtain that

$$\begin{aligned} \frac{1}{n} \|\mathfrak{X}(\tilde{\Delta}_k)\|^2 &= \frac{1}{n} \|\mathfrak{X}(Q_{k'}(\tilde{\Delta}_k))\|^2 \\ &\geq (144 \min\{I_{\leq k'}, I_{k' <}\} + 3n)^{-1} \|Q_{k'}(\tilde{\Delta}_k)\|_F^2 =: C_\kappa \|Q_{k'}(\tilde{\Delta}_k)\|_F^2 = C_\kappa \|\tilde{\Delta}_k\|_F^2, \end{aligned}$$

where  $C_\kappa > 0$  since  $n \leq \prod_k I_k$ . Using this result into (27), we have

$$\frac{C_\kappa}{6} \|\tilde{\Delta}_k\|_F^2 \leq \frac{3(K-1)C_K}{n} \Xi(\tilde{\mathcal{G}}) \|\tilde{\Delta}_k\|_F + \frac{2\lambda_n(2+\epsilon)}{K-1} \sum_{k'=1}^{K-1} \sqrt{2R_{k'}} \|\tilde{\Delta}_k\|_F.$$

Then we obtain the inequality

$$\frac{C_\kappa}{6} \|\tilde{\Delta}_k\|_F^2 \leq \frac{3(K-1)C_K}{n} \Xi(\tilde{\mathcal{G}}) \|\tilde{\Delta}_k\|_F + \frac{2\lambda_n(2+\epsilon)}{K-1} \sum_{k'=1}^{K-1} \sqrt{2R_{k'}} \|\tilde{\Delta}_k\|_F.$$

We divide the both hands side by  $\|\tilde{\Delta}_k\|_F$  about the first term, and consider the root about the second term, then we have

$$\frac{C_\kappa}{6} \|\tilde{\Delta}_k\|_F \leq \frac{3(K-1)C_K}{n} \Xi(\tilde{\mathcal{G}}) + \frac{2\lambda_n(2+\epsilon)}{K-1} \sum_{k'=1}^{K-1} \sqrt{2R_{k'}}, \quad (28)$$

by using the property  $\|\mathfrak{X}(X)\| \leq \|X\|$  for all  $X \in \mathcal{X}$ .

Finally, we define

$$\Delta_k := (\hat{G}_k - G_k^*) \times_2 G_{<k}^* \times_3 G_{k<}^*,$$

and compare  $\Delta_k$  and  $\tilde{\Delta}_k$  as

$$\|\Delta_k\| \leq \|\tilde{\Delta}_k\| + \|\tilde{\Delta}_k - \Delta_k\|.$$

We evaluate the last term by the same way of the step 2 as

$$\begin{aligned} &\|\tilde{\Delta}_k - \Delta_k\|_F \\ &\leq \left\| (\hat{G}_k - G_k^*) \times_2 (G_{<k}^* \times_3 G_{k<}^* - \tilde{G}_{<k} \times_3 \tilde{G}_{k<}) \right\|_F \\ &\leq 2c_k \left\{ \left\| (G_{<k}^* - \tilde{G}_{<k}) \times_3 G_{k<}^* \right\|_F + \left\| \tilde{G}_{<k} \times_3 (G_{k<}^* - \tilde{G}_{k<}) \right\|_F \right\} \\ &\leq 2(K-1)C_K \Xi(\tilde{\mathcal{G}}). \end{aligned}$$

Then, we have

$$\|\Delta_k\|_F - 2(K-1)C_k\Xi(\tilde{\mathcal{G}}) \leq \|\tilde{\Delta}_k\|_F.$$

Substituting the result into (28), we obtain

$$\frac{C_\kappa}{6}\|\Delta_k\|_F \leq 2(K-1)C_K(1+n^{-1})\Xi(\tilde{\mathcal{G}}) + \frac{2\lambda_n(2+\epsilon)}{K-1} \sum_{k'=1}^{K-1} \sqrt{2R_{k'}}. \quad (29)$$

**Step 4.** Combining the results.

Substituting the result of the step 3 into (29), we finally obtain

$$\|\hat{G}_k - G_k^*\| \leq 6(C_\kappa C_K)^{-1} 2(K-1)C_K(1+n^{-1})\Xi(\tilde{\mathcal{G}}) + \frac{2\lambda_n(2+\epsilon)}{K-1} \sum_{k'=1}^{K-1} \sqrt{2R_{k'}}.$$

□

We back to the proof of Theorem 5. Based on the result of Lemma 8, we will take two steps: (a) evaluate the distance between  $X(\tilde{\mathcal{G}})$  and  $X(\mathcal{G}^*)$ , and (b) show the convergence as the ALS iteration proceeds.

**Step (a).** Evaluate the distance between  $X(\tilde{\mathcal{G}})$  and  $X(\mathcal{G}^*)$ .

For brevity, we introduce new notation for  $X(\mathcal{G})$ . Using the tensor product, we denote

$$X(\mathcal{G}) = G_1 \times_2 G_2 \times_3 \cdots \times_{K-1} G_{K-1} \times_K G_K.$$

Then, we evaluate the distance between  $X(\tilde{\mathcal{G}})$  and  $X(\mathcal{G}^*)$  as

$$\begin{aligned} & X(\tilde{\mathcal{G}}) - X(\mathcal{G}^*) \\ &= \tilde{G}_1 \times_2 \cdots \times_K \tilde{G}_K - G_1^* \times_2 \cdots \times_K G_K^* \\ &= (\tilde{G}_1 \times_2 \cdots \times_{K-1} \tilde{G}_{K-1} \times_K \tilde{G}_K - \tilde{G}_1 \times_2 \cdots \times_{K-1} \tilde{G}_{K-1} \times_K G_K^*) \\ &\quad + (\tilde{G}_1 \times_2 \cdots \times_{K-1} \tilde{G}_{K-1} \times_K G_K^* - \tilde{G}_1 \times_2 \cdots \times_{K-1} G_{K-1}^* \times_K G_K^*) \\ &\quad \dots \\ &\quad + (\tilde{G}_1 \times_2 G_2^* \times_3 \cdots \times_{K-1} G_{K-1}^* \times_K G_K^* - G_1^* \times_2 \cdots \times_K G_K^*) \\ &= \sum_{k=1}^K \tilde{G}_{<k} \times_k (\tilde{G}_k - G_k^*) \times_{k+1} G_{k<}^*. \end{aligned}$$

Then, we consider the Frobenius norm as

$$\begin{aligned} & \|X(\tilde{\mathcal{G}}) - X(\mathcal{G}^*)\|_F^2 \\ &= \left\| \sum_{k=1}^K \tilde{G}_{<k} \times_k (\tilde{G}_k - G_k^*) \times_{k+1} G_{k<}^* \right\|_F^2 \\ &= \sum_{k=1}^K \sum_{k'=1}^K \left\langle \tilde{G}_{<k} \times_k (\tilde{G}_k - G_k^*) \times_{k+1} G_{k<}^*, \tilde{G}_{<k'} \times_{k'} (\tilde{G}_{k'} - G_{k'}^*) \times_{k'+1} G_{k'<}^* \right\rangle \\ &= \sum_{k=1}^K \left\| \tilde{G}_{<k} \times_k (\tilde{G}_k - G_k^*) \times_{k+1} G_{k<}^* \right\|_F^2 \\ &\quad + \sum_{k=1}^K \sum_{k' \neq k} \left\langle \tilde{G}_{<k} \times_k (\tilde{G}_k - G_k^*) \times_{k+1} G_{k<}^*, \tilde{G}_{<k'} \times_{k'} (\tilde{G}_{k'} - G_{k'}^*) \times_{k'+1} G_{k'<}^* \right\rangle. \end{aligned}$$



As same as the proof of Lemma 8, we bound the first term as

$$\left\| \tilde{G}_{<k} \times_k (\tilde{G}_k - G_k^*) \times_{k+1} \tilde{G}_{k<} \right\|_F^2 \leq C_K^2 \Xi^2(\tilde{\mathcal{G}}).$$

For the second term, we obtain

$$\begin{aligned} & \left\langle \tilde{G}_{<k} \times_k (\tilde{G}_k - G_k^*) \times_{k+1} \tilde{G}_{k<}, \tilde{G}_{<k'} \times_{k'} (\tilde{G}_{k'} - G_{k'}^*) \times_{k'+1} \tilde{G}_{k'<} \right\rangle \\ & \leq \left\| \tilde{G}_{<k} \times_k (\tilde{G}_k - G_k^*) \times_{k+1} \tilde{G}_{k<} \right\|_F \left\| \tilde{G}_{<k'} \times_{k'} (\tilde{G}_{k'} - G_{k'}^*) \times_{k'+1} \tilde{G}_{k'<} \right\|_F \\ & \leq C_K^2 \Xi^2(\tilde{\mathcal{G}}). \end{aligned}$$

Combining the results, we obtain

$$\|X(\tilde{\mathcal{G}}) - X(\mathcal{G}^*)\|_F^2 \leq (K + K^2) C_K^2 \Xi^2(\tilde{\mathcal{G}}).$$

**Step (b).** Show convergence with the ALS iteration.

Let  $\mathcal{G}^t$  be a set  $\mathcal{G}$  obtained by  $t$ -th ALS iteration. By the result of the step (a), we have

$$\|X(\mathcal{G}^t) - X(\mathcal{G}^*)\|_F^2 \leq (K + K^2) C_K^2 \Xi(\mathcal{G}^t).$$

Applying the result of Lemma 8, let  $\hat{G}_k^t$  be the minimizer of optimization of (18) with the  $t$ -th ALS iteration, we obtain for each  $t = 1, 2, \dots$ ,

$$\Xi(\mathcal{G}^t) = \max_k \|\hat{G}_k^t - G_k^*\|_F \leq 6(C_\kappa C_K)^{-1} 2(K-1)C_K(1+n^{-1})\Xi(\tilde{\mathcal{G}}) + \frac{2\lambda_n(2+\epsilon)}{K-1} \sum_{k'=1}^{K-1} \sqrt{2R_{k'}}.$$

The inequality holds since  $\mathcal{G}^{t-1}$  is the fixed  $\tilde{\mathcal{G}}$  for the  $t$ -th ALS iteration. We define the contraction coefficient

$$\chi := 12C_\kappa^{-1}(K-1)C_K(1.5+n^{-1}),$$

and using the assumption that  $\chi < 1$ , we have

$$\Xi(\mathcal{G}^t) \leq \max \left\{ \chi^t \Xi(\mathcal{G}^0), 6(C_\kappa C_K)^{-1} \frac{2\lambda_n(2+\epsilon)}{K} \sum_{k'=1}^{K-1} \sqrt{2R_{k'}} \right\}, \quad (30)$$

where  $\mathcal{G}^0$  is an initial value of  $\mathcal{G}$ . With Assumption 4, we set  $t$  sufficiently large as

$$t \geq (\log \chi)^{-1} \left\{ \log \left( 6(C_\kappa C_K)^{-1} \left( \frac{2\lambda_n(2+\epsilon)}{K} \sum_{k'=1}^{K-1} \sqrt{2R_{k'}} \right) \right) - \log \Xi(\mathcal{G}^0) \right\},$$

we obtain

$$\|X(\mathcal{G}^t) - X(\mathcal{G}^*)\|_F^2 \leq 12C_\kappa^{-1} K^2 C_K \left( \frac{2\lambda_n(2+\epsilon)}{K} \sum_{k'=1}^{K-1} \sqrt{2R_{k'}} \right)^2.$$

As we set  $\hat{X} := X(\mathcal{G}^t)$ , we obtain the result. □

## D Time Complexity of TT-RAM

To update  $g_k^{(\ell+1)}$ , we need to compute

- $A = \Omega^T \Omega$ , which requires  $O(nI^2 R^4)$ ,
- $B = \sum_{k'=1}^{K-1} \Gamma_{k'}^T \Gamma_{k'}$ , which requires  $O(KD^2 I^2 R^4)$ ,
- the inversion of an  $IR^2 \times IR^2$  matrix  $(A+B)$ , which requires  $O(I^3 R^6)$ ,

- $c = \Omega^T Y$ , which requires  $O(nIR^2)$ ,
- $d = \tilde{V}_k(W_{k'}^{(\ell)})$ , which requires  $O(D^2)$ ,
- $e = \frac{1}{K-1} \sum_{k'=1}^{K-1} \Gamma_{k'}^T (\eta d - \beta_{k'}^{(\ell)})$ , which requires  $O(KD^2IR^2)$ ,

To update  $W_{k'}^{(\ell+1)}$ , we need to compute

- $a = \Gamma_{k'} g_k^{(\ell+1)}$ , which requires  $O(D^2IR^2)$ ,
- $\tilde{V}_k^{-1}(a + \beta_{k'}^{(\ell)})$ , which requires  $O(D^2)$ ,
- the proximal operation, which requires  $O(D^3)$ .

To update  $\beta_{k'}^{(\ell+1)}$ , we need to compute

- $a = \Gamma_{k'} g_k^{(\ell+1)}$ , which requires  $O(D^2IR^2)$ ,
- $b = \tilde{V}_k(W_{k'}^{(\ell+1)})$ , which requires  $O(D^2)$ ,

Because there are  $g_k^{(\ell+1)}$  for  $k = 1, \dots, K$ ,  $W_{k'}^{(\ell+1)}$  for  $k, k' = 1, \dots, K$ , and  $\beta_{k'}^{(\ell+1)}$  for  $k, k' = 1, \dots, K$ , the total time complexity is

$$\begin{aligned}
& O(K(nI^2R^4 + KD^2I^2R^4 + I^3R^6 + nIR^2 + D^2 + KD^2IR^2)) \\
& + O(K^2(D^2IR^2 + D^2 + D^3)) + O(K^2(D^2IR^2 + D^2)) \\
& = O(K(nI^2R^4 + KD^2I^2R^4 + I^3R^6)) + O(K^2(D^2IR^2 + D^3)) \\
& = O(K(nI^2R^4 + KD^2I^2R^4 + I^3R^6)) + O(K^2D^2IR^2) \\
& = O(nKI^2R^4 + K^2D^2I^2R^4 + KI^3R^6) \\
& = O(nKI^2R^4 + K^2D^2I^2R^4)
\end{aligned}$$

In the third line and the last line, we assumed  $D = O(IR^2)$  and  $IR^2 = O(n)$ , respectively.
